# Supplementary material for: Partitioning of Persistent Organic Pollutants between Adipose Tissue and Serum in Human Studies
Source: MDPI journal article supplement (doi:10.3390/toxics11010041), 2022-12-31
Supplement: s1 [file s1]

# Supplemental Materials

## Partitioning of persistent organic pollutants between adipose tissue and serum in human studies

Table S1. Search strings

| Scheme 05.                                                                                                                                                                                                                                                                                                                                                                                                                                                      |
|-----------------------------------------------------------------------------------------------------------------------------------------------------------------------------------------------------------------------------------------------------------------------------------------------------------------------------------------------------------------------------------------------------------------------------------------------------------------|
| “(TITLE-ABS-KEY(“Persistent Organic Pollutants”) OR TITLE-ABS-KEY(“Polybrominated diphenyl ethers”) OR TITLE-ABS-KEY(“polychlorinated biphenyls”) OR TITLE-ABS-KEY(“Halogenated Diphenyl Ethers”) OR TITLE-ABS-KEY(“Hexachlorobenzene”) OR TITLE-ABS-KEY(“Hexachlorocyclohexane”) OR TITLE-ABS-KEY(“Dioxins and Dioxin-like Compounds”) AND TITLE-ABS-KEY(“human”) AND (TITLE-ABS-KEY(“adipose”) OR TITLE-ABS-KEY(“Adipose Tissue”) ) AND ( (PUBYEAR > 2011) )” |
| PUBMED (05/08/2022)                                                                                                                                                                                                                                                                                                                                                                                                                                             |
| (“Persistent Organic Pollutants”[Text Word] OR “Polybrominated diphenyl ethers”[Text Word] OR “polychlorinated biphenyls”[Text Word] OR “Halogenated Diphenyl Ethers”[Text Word] OR Hexachlorobenzene[Text Word] OR Hexachlorocyclohexane[Text Word] OR “Dioxins and Dioxin-like Compounds”[MeSH Terms] AND “human”[Text Word] AND (“adipose”[Text Word] OR “Adipose Tissue”[MeSH Terms]) AND (“2011/01/01”[Date - Publication].                                |
